# Supplementary material for: Genotype-phenotype analysis in Mowat-Wilson syndrome associated with two novel and two recurrent ZEB2 variants
Source: PubMed Central journal article supplement — Exp Ther Med. 2020 Oct 27;20(6):263. doi: 10.3892/etm.2020.9393 (PMC7664618; doi:10.3892/etm.2020.9393), 2020-10-27

Figure S1. Clinical features of patient 2 at age 2 years and 4 months. Hypertelorism, broad nasal bridge, pointed chin, prominent nasal tip and uplifted earlobes with a central depression are signs of facial abnormalities presenting in patients with Mowat-Wilson syndrome.

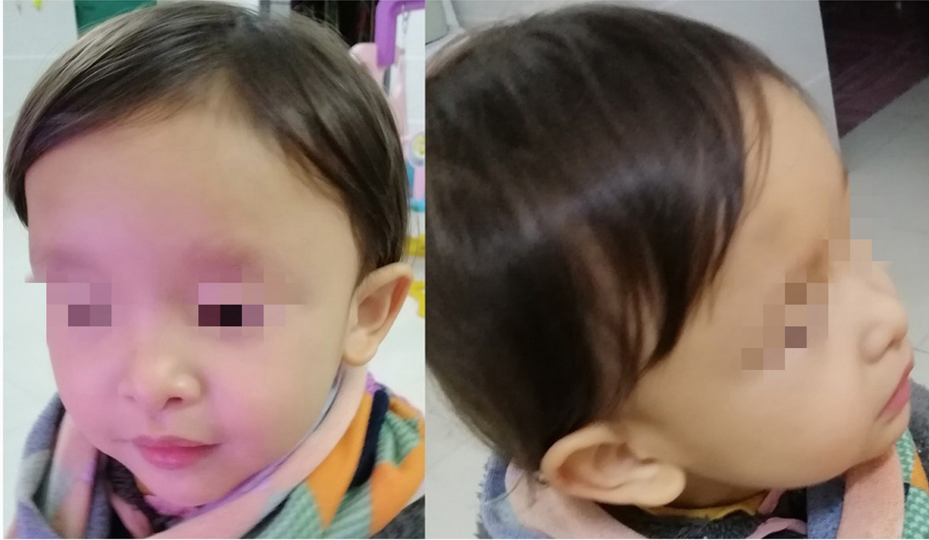

Supplement: Supplementary_Data.pdf [file Supplementary_Data.pdf]
